# Supplementary material
Source: PubMed Central journal article supplement (PMC10239723)
Supplement: 12671_2023_2148_MOESM1_ESM.pdf [file 12671_2023_2148_MOESM1_ESM.pdf]

## Supplemental Materials

**Table S1.** Search Terms Used in Database Searches

| Database  | Search Terms                                                                                                                                                                                                                                                                                                                                                                                                                                                                                      |
|-----------|---------------------------------------------------------------------------------------------------------------------------------------------------------------------------------------------------------------------------------------------------------------------------------------------------------------------------------------------------------------------------------------------------------------------------------------------------------------------------------------------------|
| PubMed    | (“self-compassion*”[Title/Abstract] OR “self-kindness*”[Title/Abstract]) AND (program*[Title/Abstract] OR intervention*[Title/Abstract] OR treatment*[Title/Abstract] OR therap*[Title/Abstract] OR training*[Title/Abstract] OR counsel*[Title/Abstract] OR efficacy[Title/Abstract] OR effectiveness[Title/Abstract] OR effect*[Title/Abstract] OR impact*[Title/Abstract] OR evaluation*[Title/Abstract] OR random*[Title/Abstract])                                                           |
| CINAHL    | (TI “self-compassion*” OR AB “self-compassion*” OR TI “self-kindness*” OR AB “self-kindness*”) AND (TI program* OR AB program* OR TI intervention* OR AB intervention* OR TI treatment* OR AB treatment* OR TI therap* OR AB therap* OR TI training* OR AB training* OR TI counsel* OR AB counsel* OR TI efficacy OR AB efficacy OR TI effectiveness OR AB effectiveness OR TI effect* OR AB effect* OR TI impact* OR AB impact* OR TI evaluation* OR AB evaluation* OR TI random* OR AB random*) |
| PsycInfo® | (TIAB(“self-compassion*” OR “self-kindness*”)) AND (TIAB(program* OR intervention* OR treatment* OR therap* OR training* OR counsel* OR efficacy OR effectiveness OR effect* OR impact* OR evaluation* OR random*))                                                                                                                                                                                                                                                                               |
| Scopus    | ( TITLE-ABS-KEY ( “self-compassion*” OR “self-kindness*” ) AND TITLE-ABS-KEY ( program* OR intervention* OR treatment* OR therap* OR training* OR counsel* OR efficacy OR effectiveness OR effect* OR impact* OR evaluation* OR random* ) )                                                                                                                                                                                                                                                       |

**Table S2.** Risk of Bias (RoB) of the Included Studies

| Reference                           | Random Sequence Generation | Allocation Concealment | Blinding of Participants and Personnel | Blinding of Outcome Assessment | Incomplete Outcome Data | Selective Reporting | Overall RoB |
|-------------------------------------|----------------------------|------------------------|----------------------------------------|--------------------------------|-------------------------|---------------------|-------------|
| Al-Refae et al. (2021)              | Low                        | Unclear                | High                                   | High                           | High                    | Unclear             | High        |
| Anuwatgasem et al. (2020)           | Low                        | Unclear                | Unclear                                | Unclear                        | High                    | Unclear             | High        |
| Arimitsu (2016)                     | Unclear                    | Unclear                | Unclear                                | Unclear                        | High                    | Unclear             | High        |
| Beaumont et al. (2012)              | Unclear                    | Unclear                | High                                   | High                           | Unclear                 | Unclear             | High        |
| Beshai et al. (2020)                | Low                        | Unclear                | Unclear                                | Unclear                        | Low                     | Low                 | Unclear     |
| Bluth et al. (2016)                 | Unclear                    | Unclear                | Unclear                                | Unclear                        | Low                     | Unclear             | Unclear     |
| Boggiss et al. (2020)               | Low                        | Low                    | Unclear                                | Unclear                        | Unclear                 | High                | High        |
| Cândeia & Szentágotai-Táatar (2018) | Low                        | Unclear                | Unclear                                | Unclear                        | High                    | Unclear             | High        |
| Carlyle et al. (2019)               | Unclear                    | Unclear                | Low                                    | Low                            | Unclear                 | Unclear             | Unclear     |
| Collado-Navarro et al. (2021)       | Low                        | Low                    | Unclear                                | Unclear                        | Low                     | Low                 | Unclear     |
| D'Alton et al. (2019)               | Low                        | Low                    | High                                   | High                           | High                    | Low                 | High        |
| DeTore et al. (2022)                | Low                        | Unclear                | Unclear                                | Unclear                        | Low                     | Unclear             | Unclear     |
| Dundas et al. (2017)                | Low                        | Unclear                | Unclear                                | Low                            | High                    | Unclear             | High        |
| Eriksson et al. (2018)              | Unclear                    | Unclear                | Unclear                                | High                           | High                    | Unclear             | High        |
| Fernandes et al. (2022)             | Low                        | Low                    | High                                   | High                           | Low                     | Low                 | High        |
| Friis et al. (2016)                 | Unclear                    | Unclear                | Unclear                                | High                           | Low                     | Low                 | Unclear     |
| Gammer et al. (2020)                | Low                        | Low                    | Unclear                                | Unclear                        | Low                     | Low                 | Unclear     |
| Guo et al. (2020)                   | Low                        | Low                    | High                                   | High                           | High                    | High                | High        |
| Hasselberg & Rönnlund (2020)        | Unclear                    | Unclear                | Unclear                                | Unclear                        | High                    | Unclear             | High        |
| Haukaas et al. (2018)               | Low                        | Unclear                | Unclear                                | Unclear                        | Low                     | Unclear             | Unclear     |
| Held & Owens (2015)                 | Unclear                    | Unclear                | Unclear                                | Unclear                        | Low                     | Unclear             | Unclear     |
| Huang et al. (2021)                 | Unclear                    | Unclear                | Unclear                                | Unclear                        | High                    | Unclear             | High        |
| Javidi et al. (2021)                | Low                        | Low                    | Low                                    | Low                            | High                    | Low                 | High        |
| Kelly & Carter (2015)               | Low                        | Unclear                | Unclear                                | Unclear                        | Low                     | Unclear             | Unclear     |

|                                  |         |         |         |         |         |         |         |
|----------------------------------|---------|---------|---------|---------|---------|---------|---------|
| Kelly et al. (2009)              | Unclear |
| Kelman et al. (2018)             | Unclear | Unclear | Unclear | Unclear | High    | Low     | High    |
| Krieger et al. (2019)            | Low     | Low     | Unclear | High    | Low     | Low     | Unclear |
| Lennard et al. (2021)            | Unclear | Unclear | Unclear | Unclear | High    | Low     | High    |
| Mak et al. (2018)                | Low     | Low     | High    | High    | Low     | Low     | High    |
| Martínez-Borrás et al. (2022)    | Low     | Unclear | High    | High    | High    | Unclear | High    |
| Matos et al. (2017)              | Unclear | Unclear | Unclear | High    | High    | Unclear | High    |
| Matos et al. (2022)              | Low     | Unclear | High    | High    | High    | Low     | High    |
| Mifsud et al. (2021)             | Low     |
| Nadeau et al. (2021)             | Low     | Low     | High    | High    | High    | Unclear | High    |
| Navab et al. (2019)              | Unclear | Unclear | Unclear | High    | High    | Unclear | High    |
| Neff & Germer (2013)             | Unclear | Unclear | Unclear | Unclear | High    | Unclear | High    |
| Noorbala et al. (2013)           | Unclear | Unclear | Unclear | High    | High    | Unclear | High    |
| Preuss et al. (2021)             | Low     | Low     | High    | High    | Low     | Low     | High    |
| Sajjadi et al. (2022)            | Unclear | Unclear | Unclear | Unclear | Low     | Unclear | Unclear |
| Savari et al. (2021)             | Low     | Low     | Unclear | Unclear | Low     | Unclear | Unclear |
| Schnepper et al. (2020)          | Low     | Low     | Unclear | Unclear | High    | Unclear | High    |
| Schuling et al. (2020)           | Low     | Low     | High    | High    | Low     | Low     | High    |
| Seekis et al. (2020)             | Low     | Unclear | Unclear | Unclear | Low     | Unclear | Unclear |
| Shahar et al. (2015)             | Low     | Low     | Unclear | Unclear | Low     | Unclear | Unclear |
| Shapira & Mongrain (2010)        | Low     | Unclear | Unclear | Unclear | High    | Unclear | High    |
| Sommers-Spijkerman et al. (2018) | Low     | Low     | Unclear | High    | Low     | Low     | Unclear |
| Stevenson et al. (2019)          | Low     | Unclear | Unclear | Unclear | Low     | Low     | Unclear |
| Teale Sapach et al. (2023)       | Low     | Unclear | High    | High    | Low     | Low     | High    |
| Torrijos-Zarcero et al. (2021)   | Low     | Low     | High    | High    | Low     | Low     | High    |

|                           |         |         |         |         |      |         |         |
|---------------------------|---------|---------|---------|---------|------|---------|---------|
| Urken & LeCroy<br>(2021)  | Low     | Unclear | Unclear | Unclear | High | Unclear | High    |
| Weibel et al.<br>(2017)   | Low     | Unclear | High    | High    | High | Unclear | High    |
| Williamson (2020)         | Low     | Unclear | High    | High    | High | Unclear | High    |
| Wong & Mak<br>(2016)      | Low     | Low     | Low     | Low     | High | Unclear | High    |
| Woodfin et al.<br>(2021)  | Unclear | Unclear | Unclear | Unclear | High | High    | High    |
| Yadavaia et al.<br>(2014) | Low     | Unclear | Unclear | High    | Low  | Unclear | Unclear |
| Zheng et al.<br>(2022)    | Low     | Low     | Low     | Low     | Low  | Low     | Low     |

---

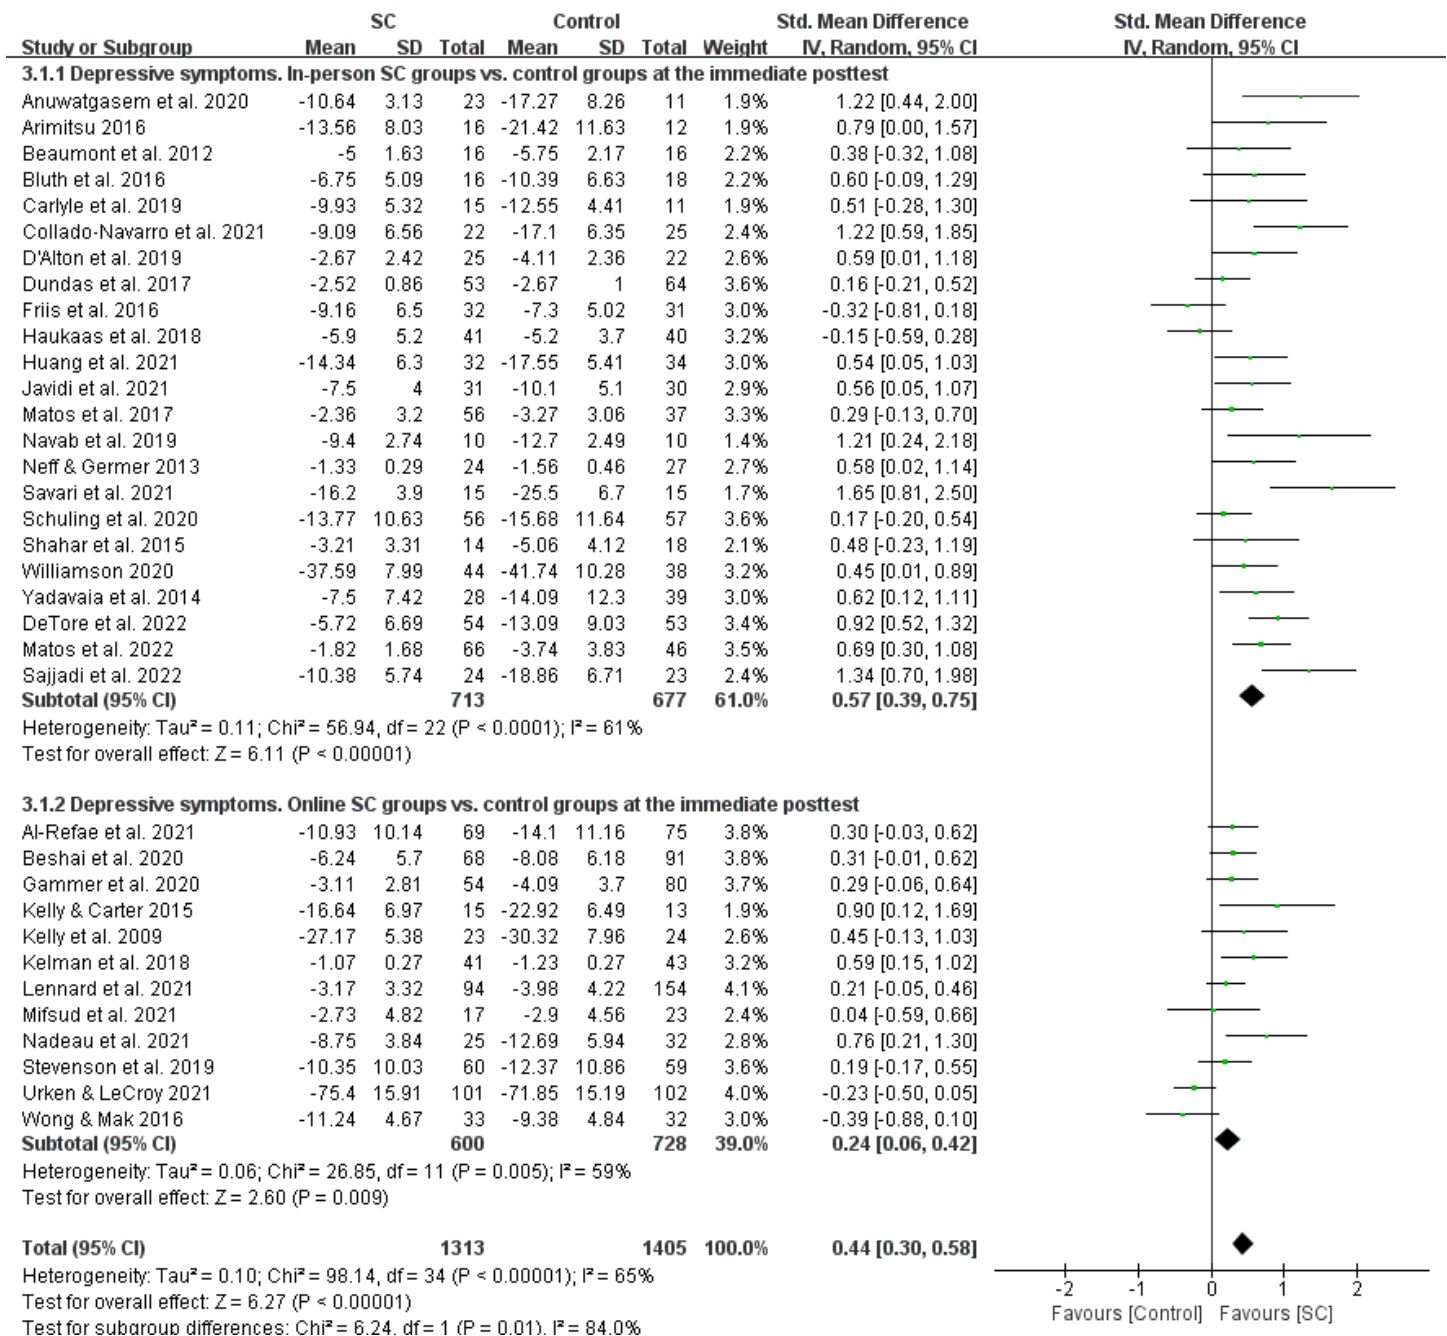

**Fig. S1** Forest plots showing effects of self-compassion interventions on depressive symptoms according to the intervention delivery modes at the immediate posttest

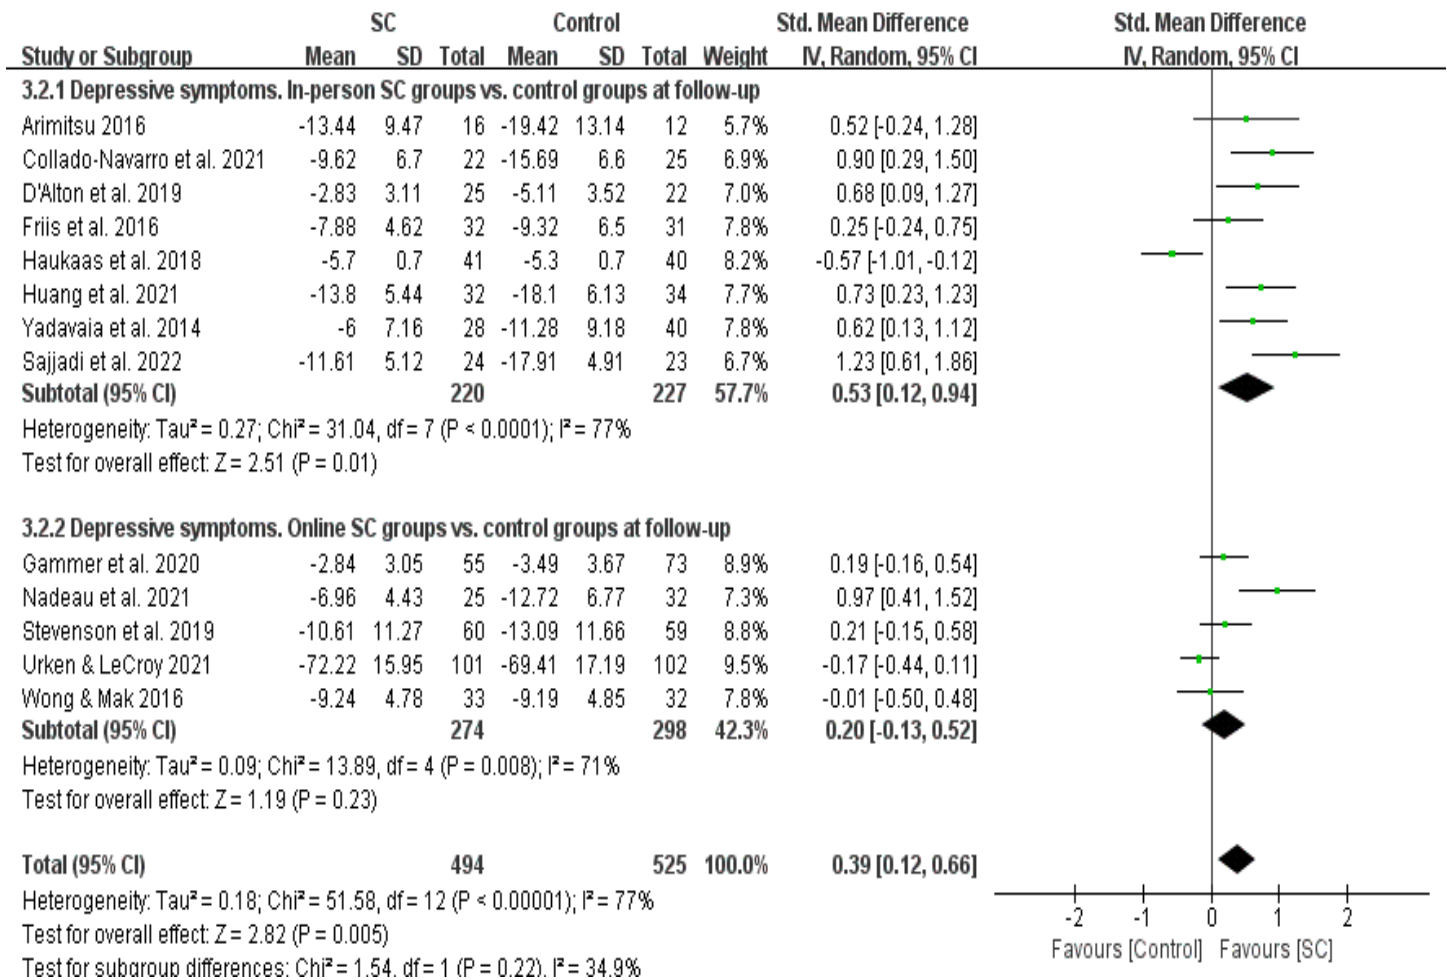

**Fig. S2** Forest plots showing effects of self-compassion interventions on depressive symptoms according to the intervention delivery modes at follow-up

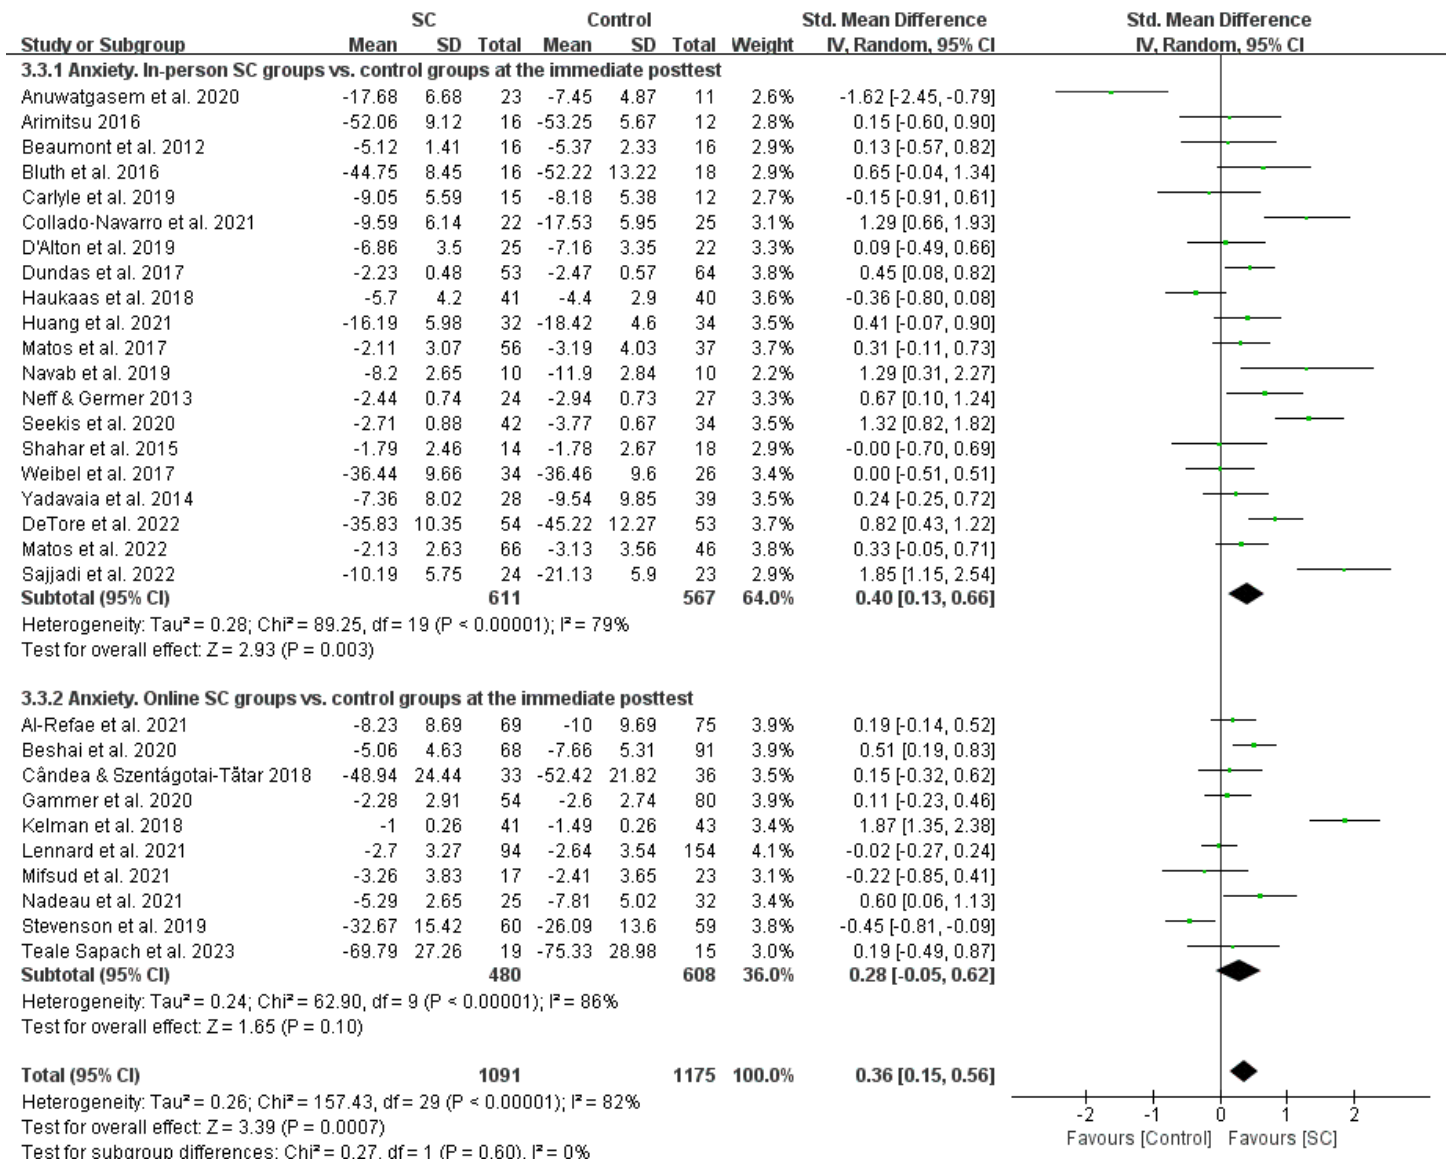

**Fig. S3** Forest plots showing effects of self-compassion interventions on anxiety according to the intervention delivery modes at the immediate posttest

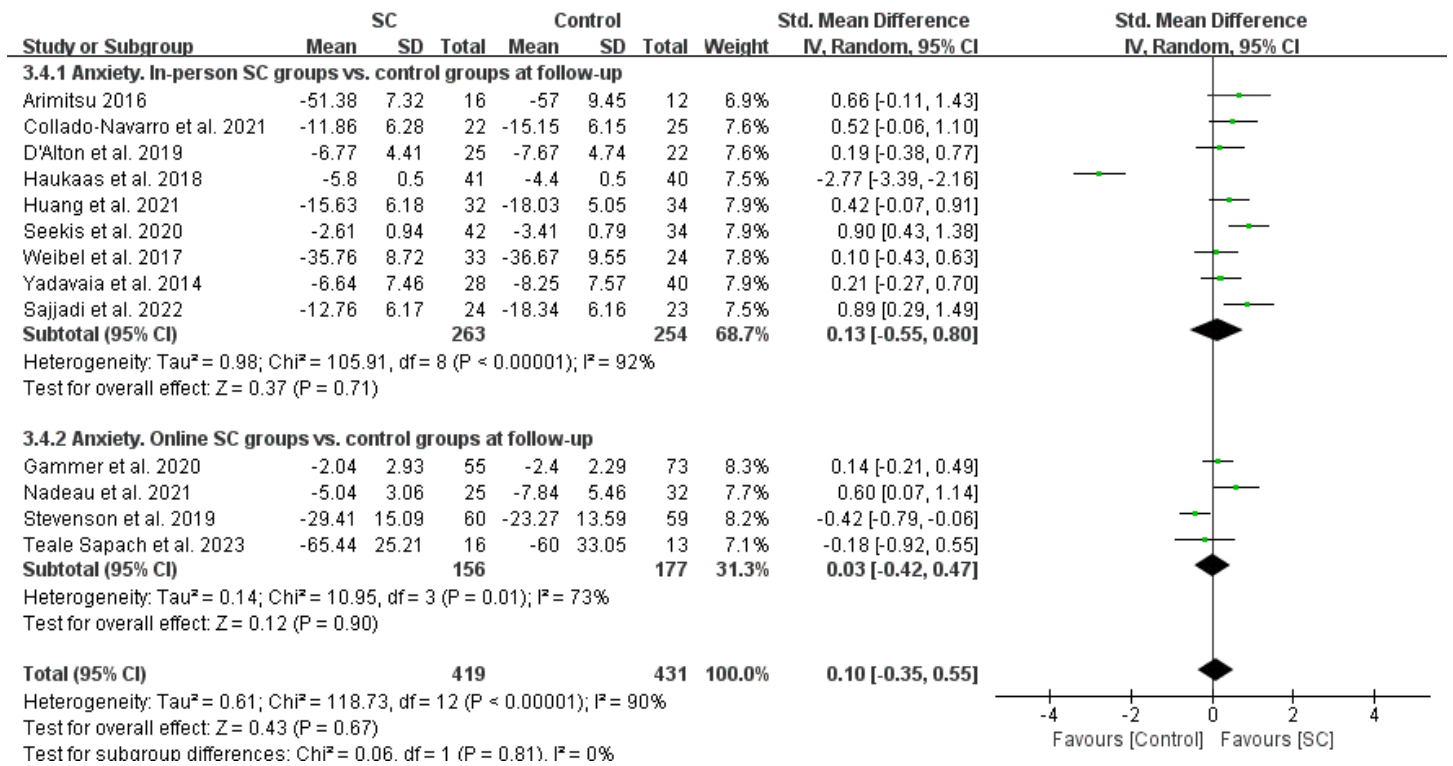

**Fig. S4** Forest plots showing effects of self-compassion interventions on anxiety according to the intervention delivery modes at follow-up



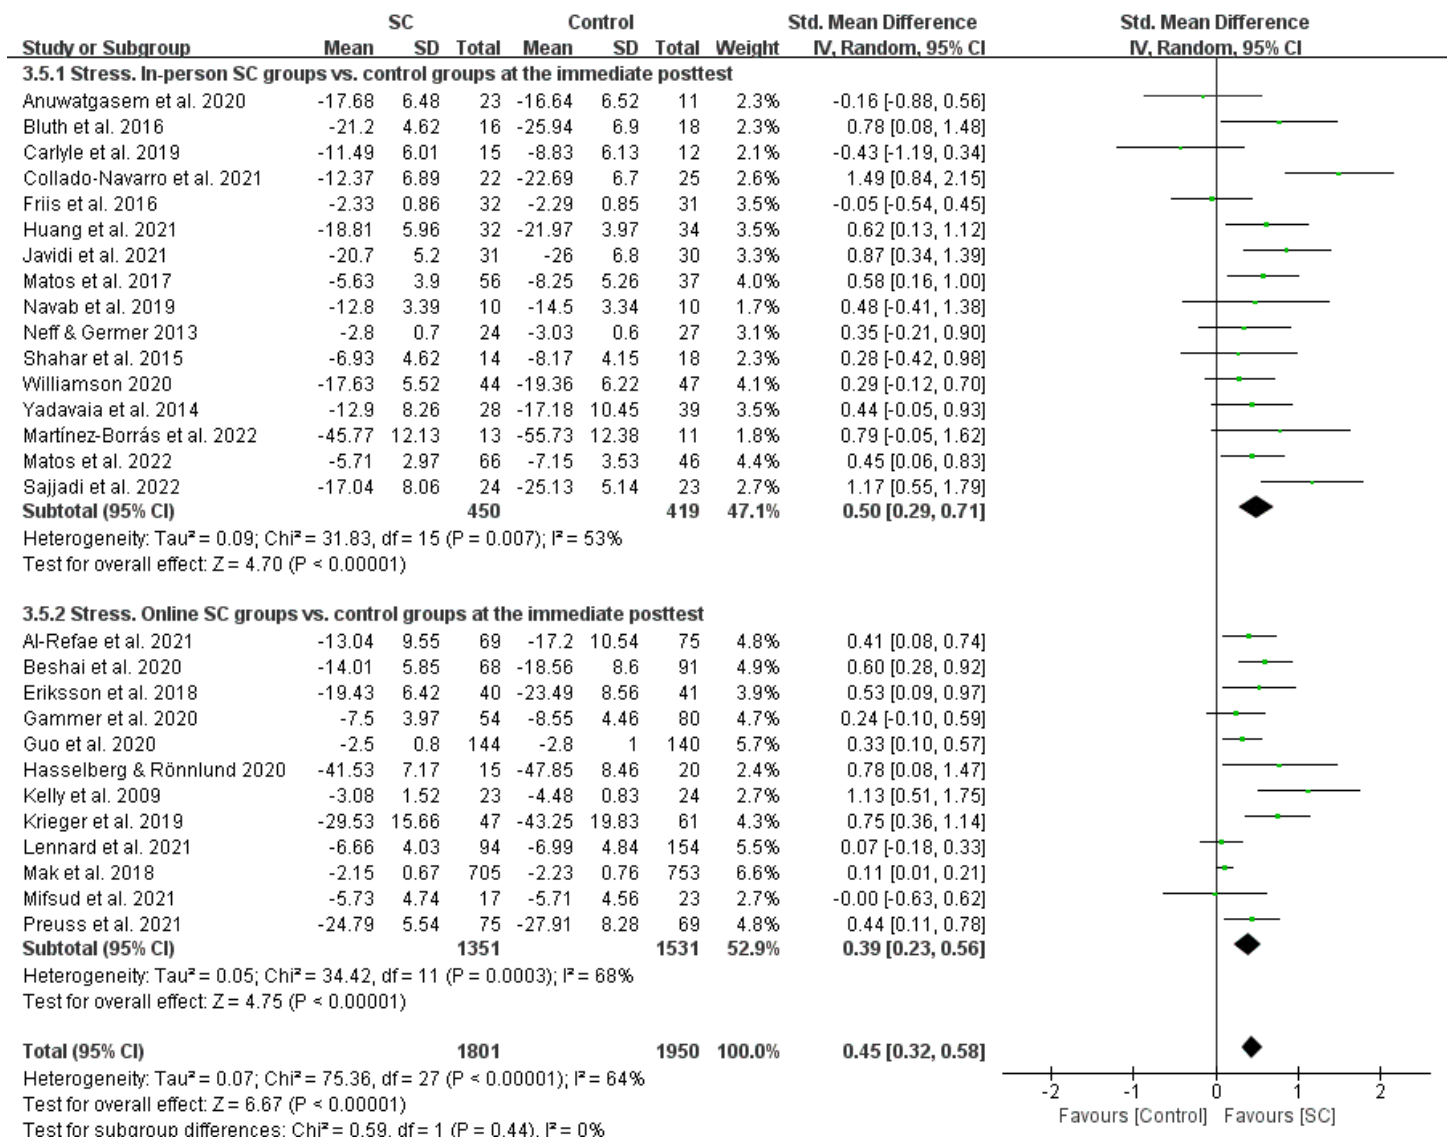

**Fig. S5** Forest plots showing effects of self-compassion interventions on stress according to the intervention delivery modes at the immediate posttest

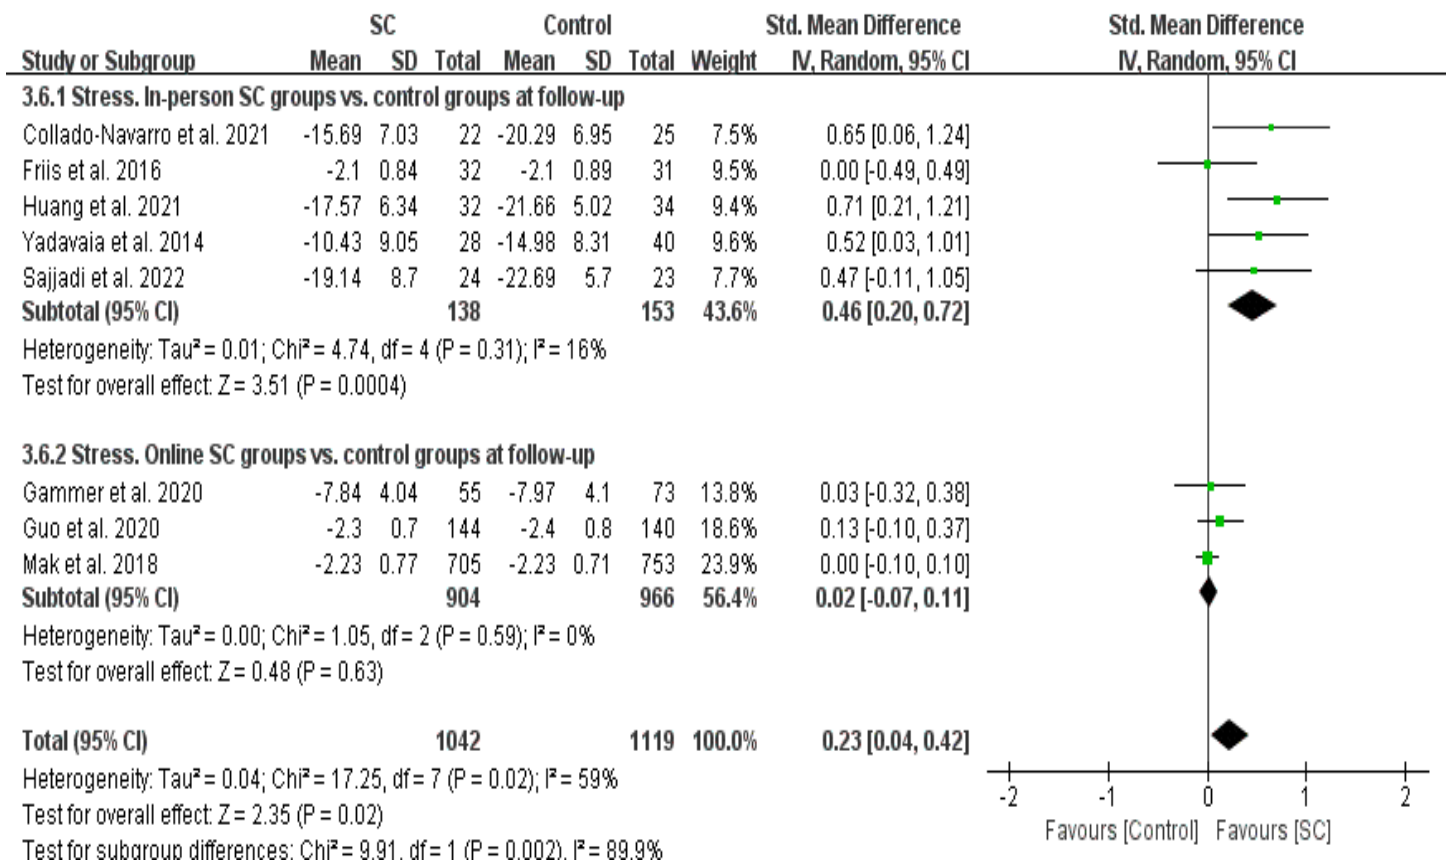

**Fig. S6** Forest plots showing effects of self-compassion interventions on stress according to the intervention delivery modes at follow-up

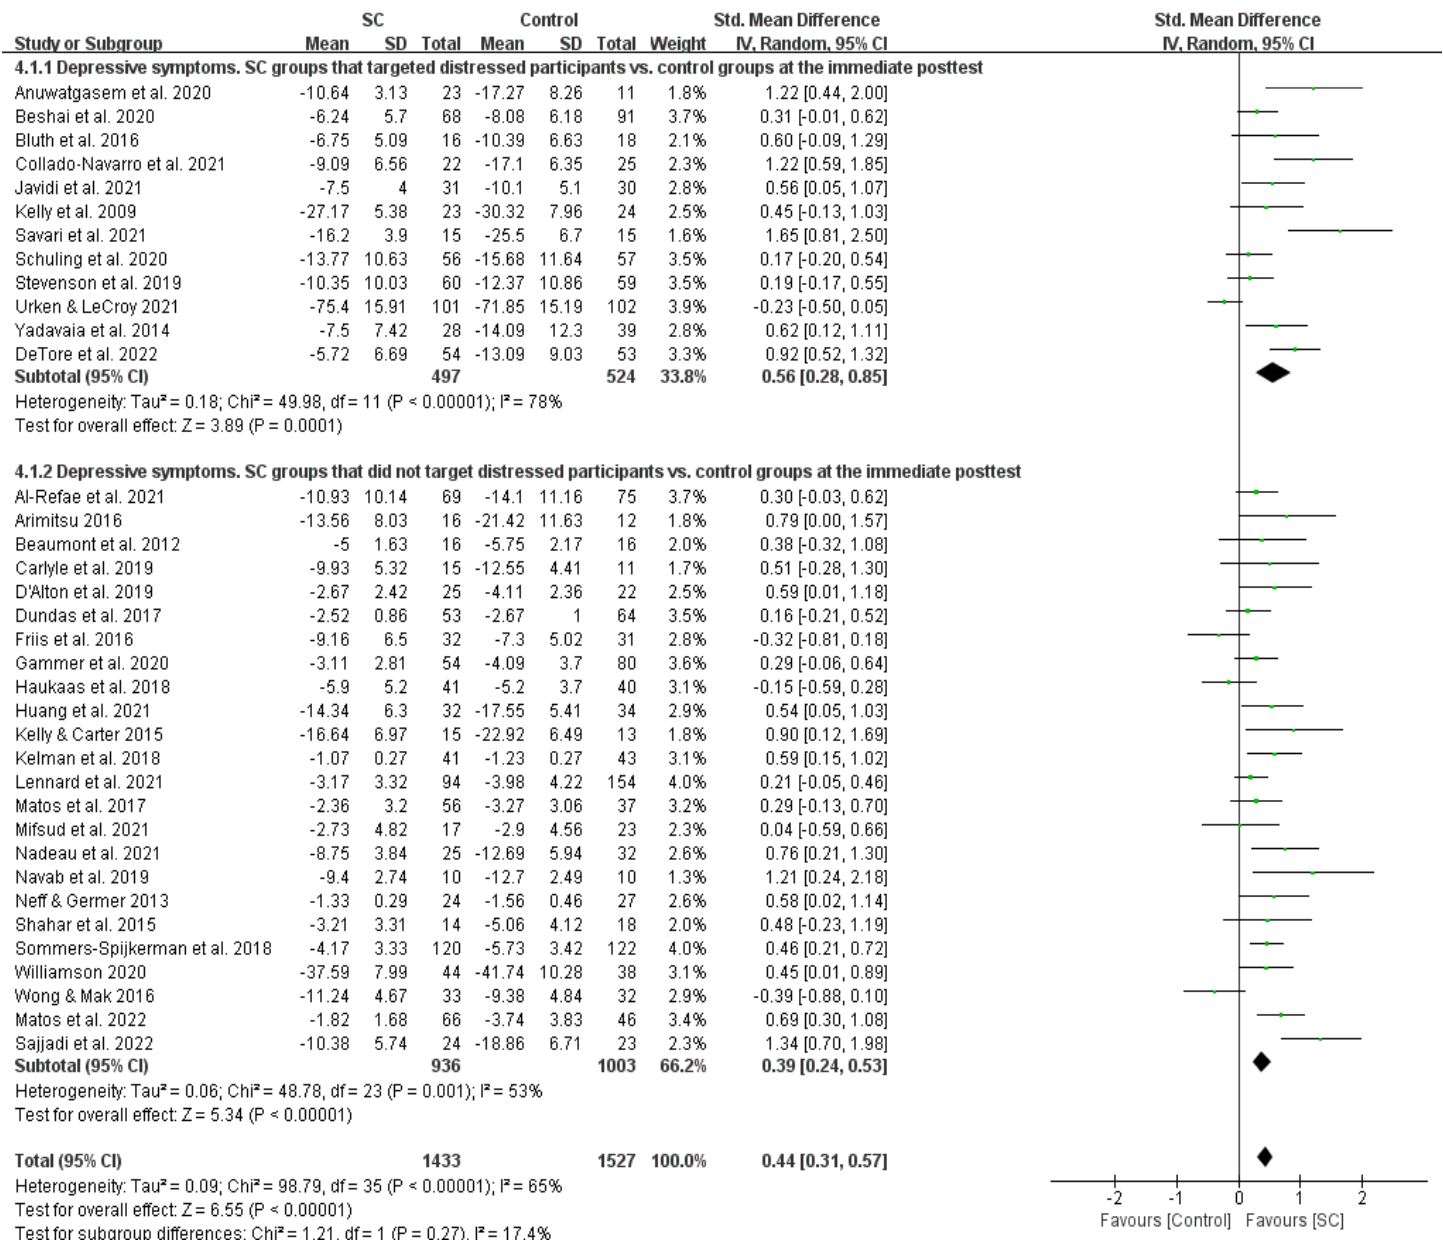

**Fig. S7** Forest plots showing effects of self-compassion interventions on depressive symptoms according to the involvement of targeted distressed participants at the immediate posttest

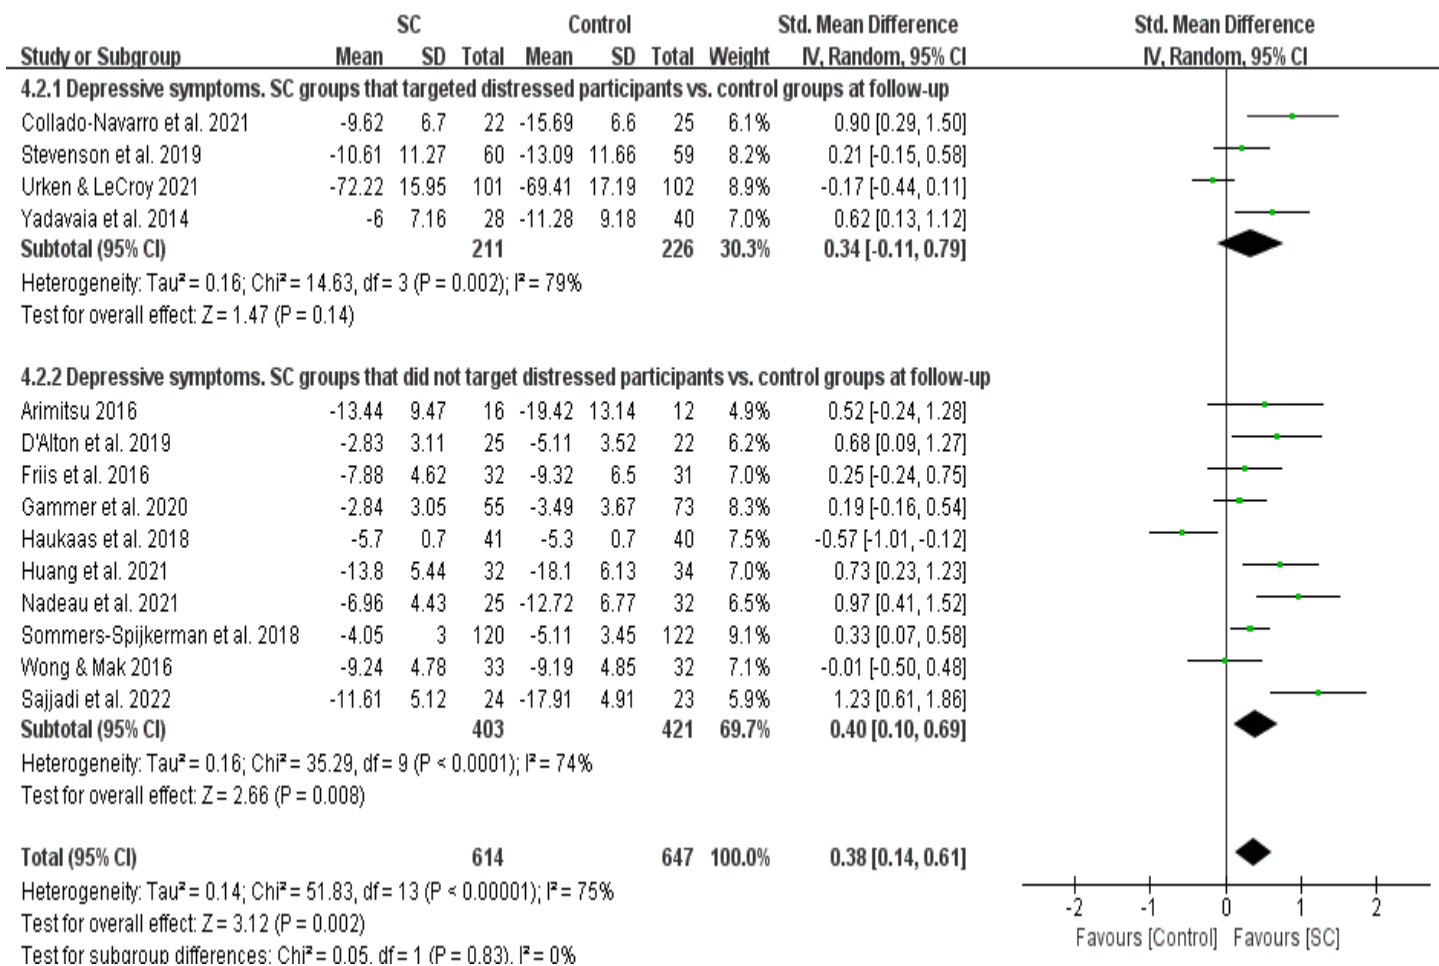

**Fig. S8** Forest plots showing effects of self-compassion interventions on depressive symptoms according to the involvement of targeted distressed participants at follow-up

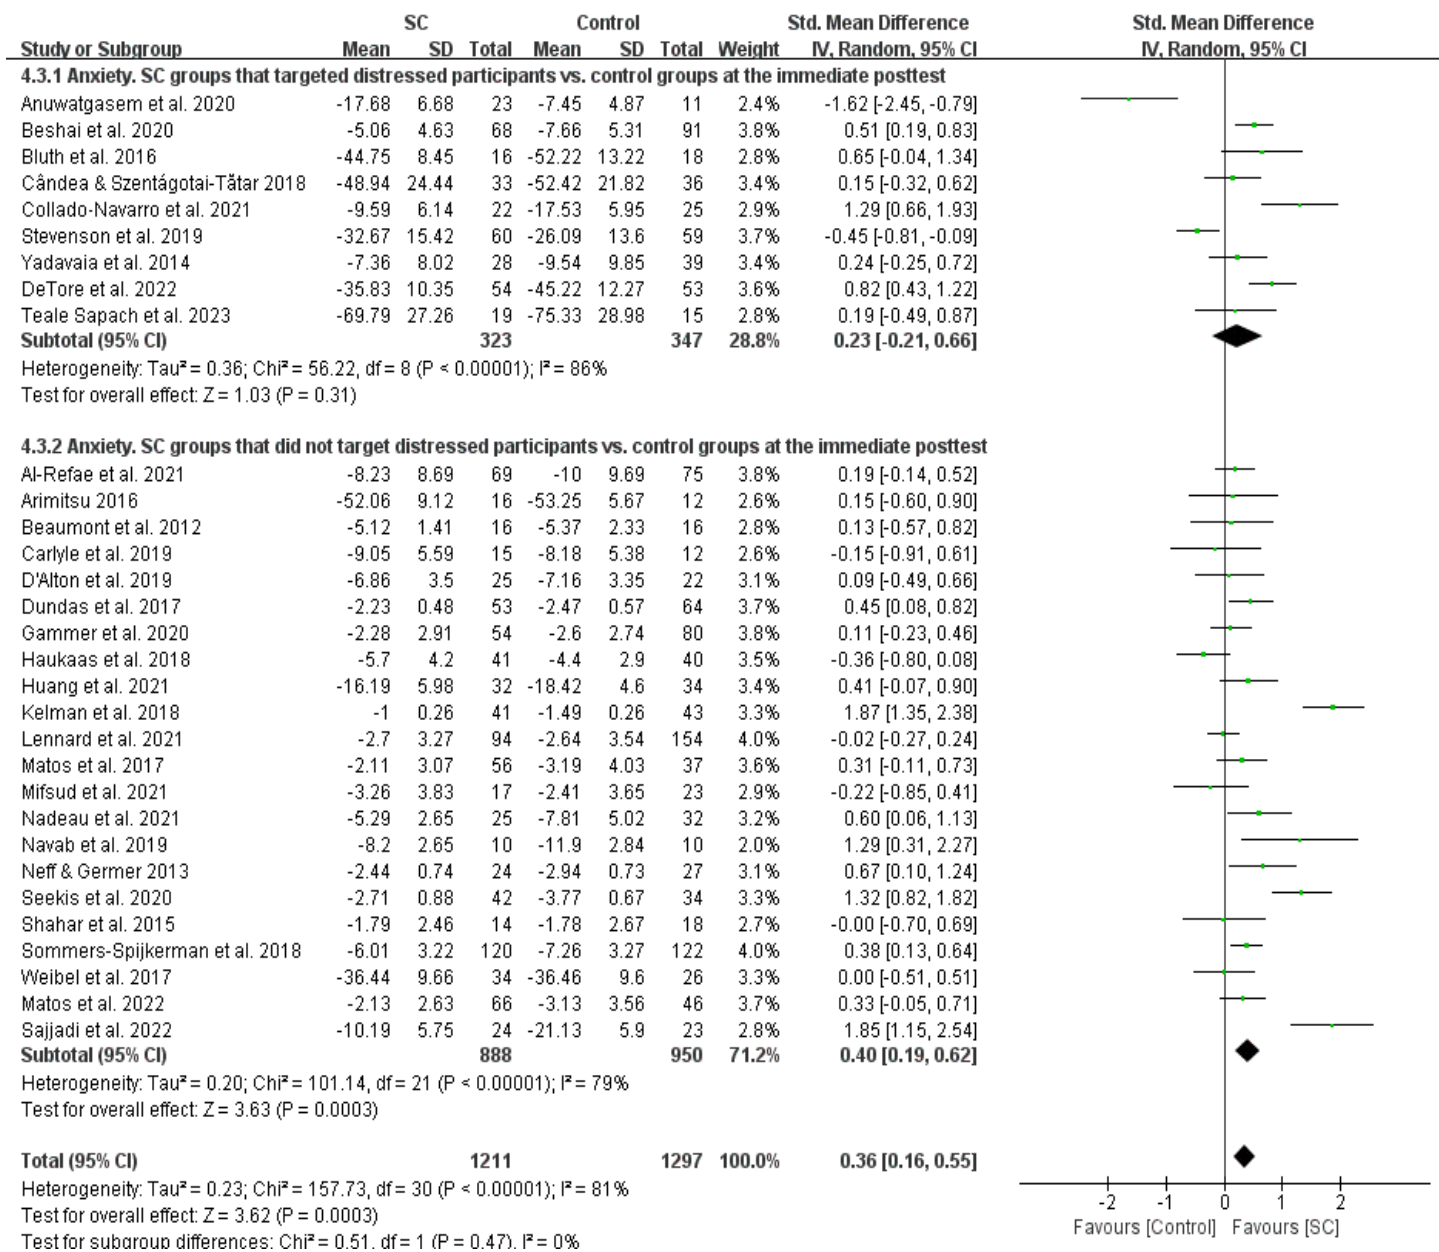

**Fig. S9** Forest plots showing effects of self-compassion interventions on anxiety according to the involvement of targeted distressed participants at the immediate posttest

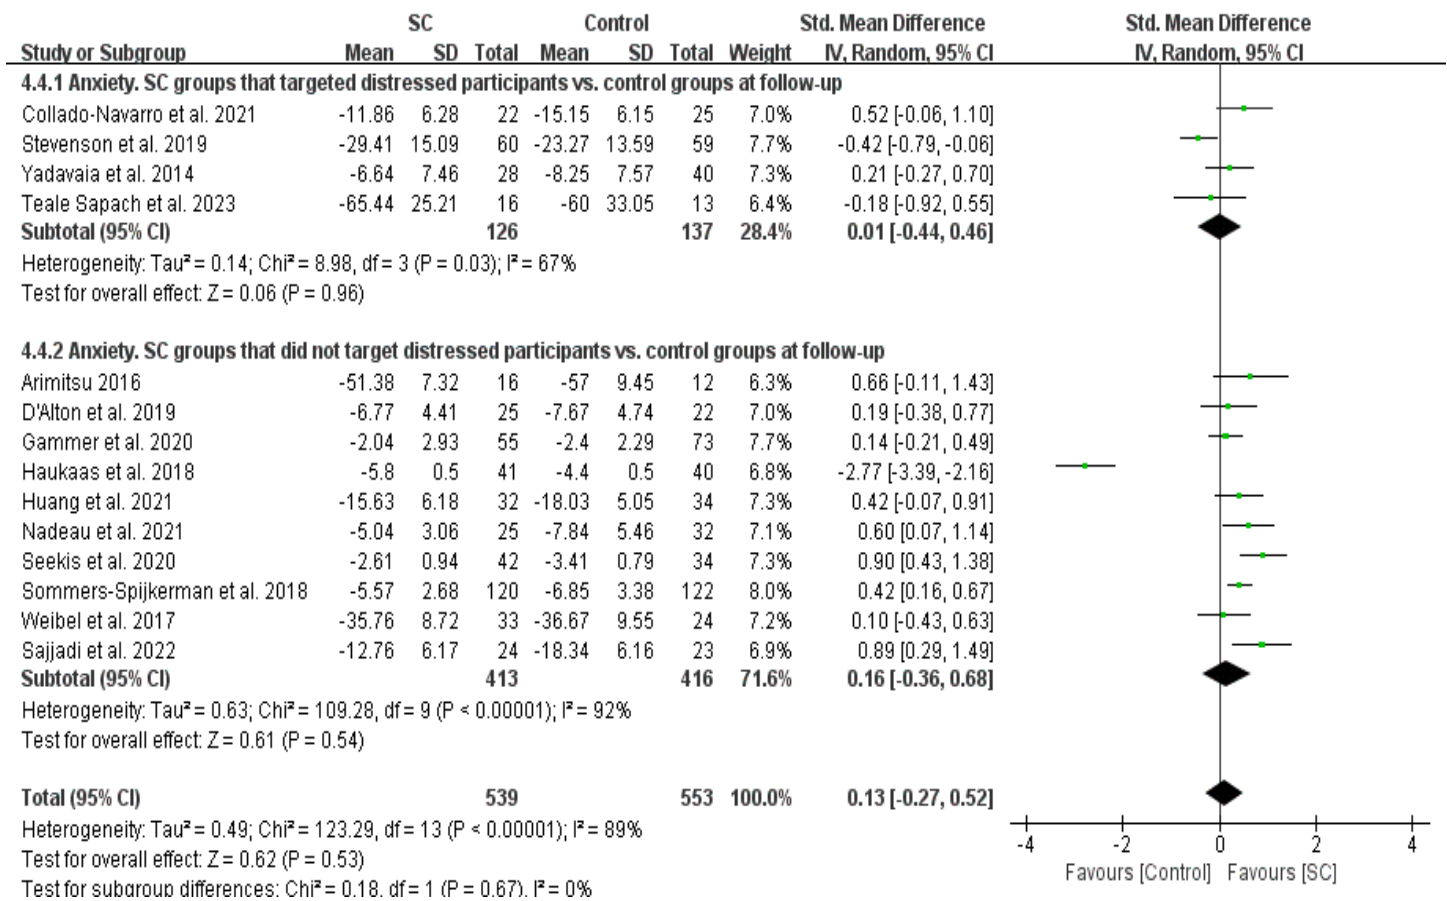

**Fig. S10** Forest plots showing effects of self-compassion interventions on anxiety according to the involvement of targeted distressed participants at follow-up

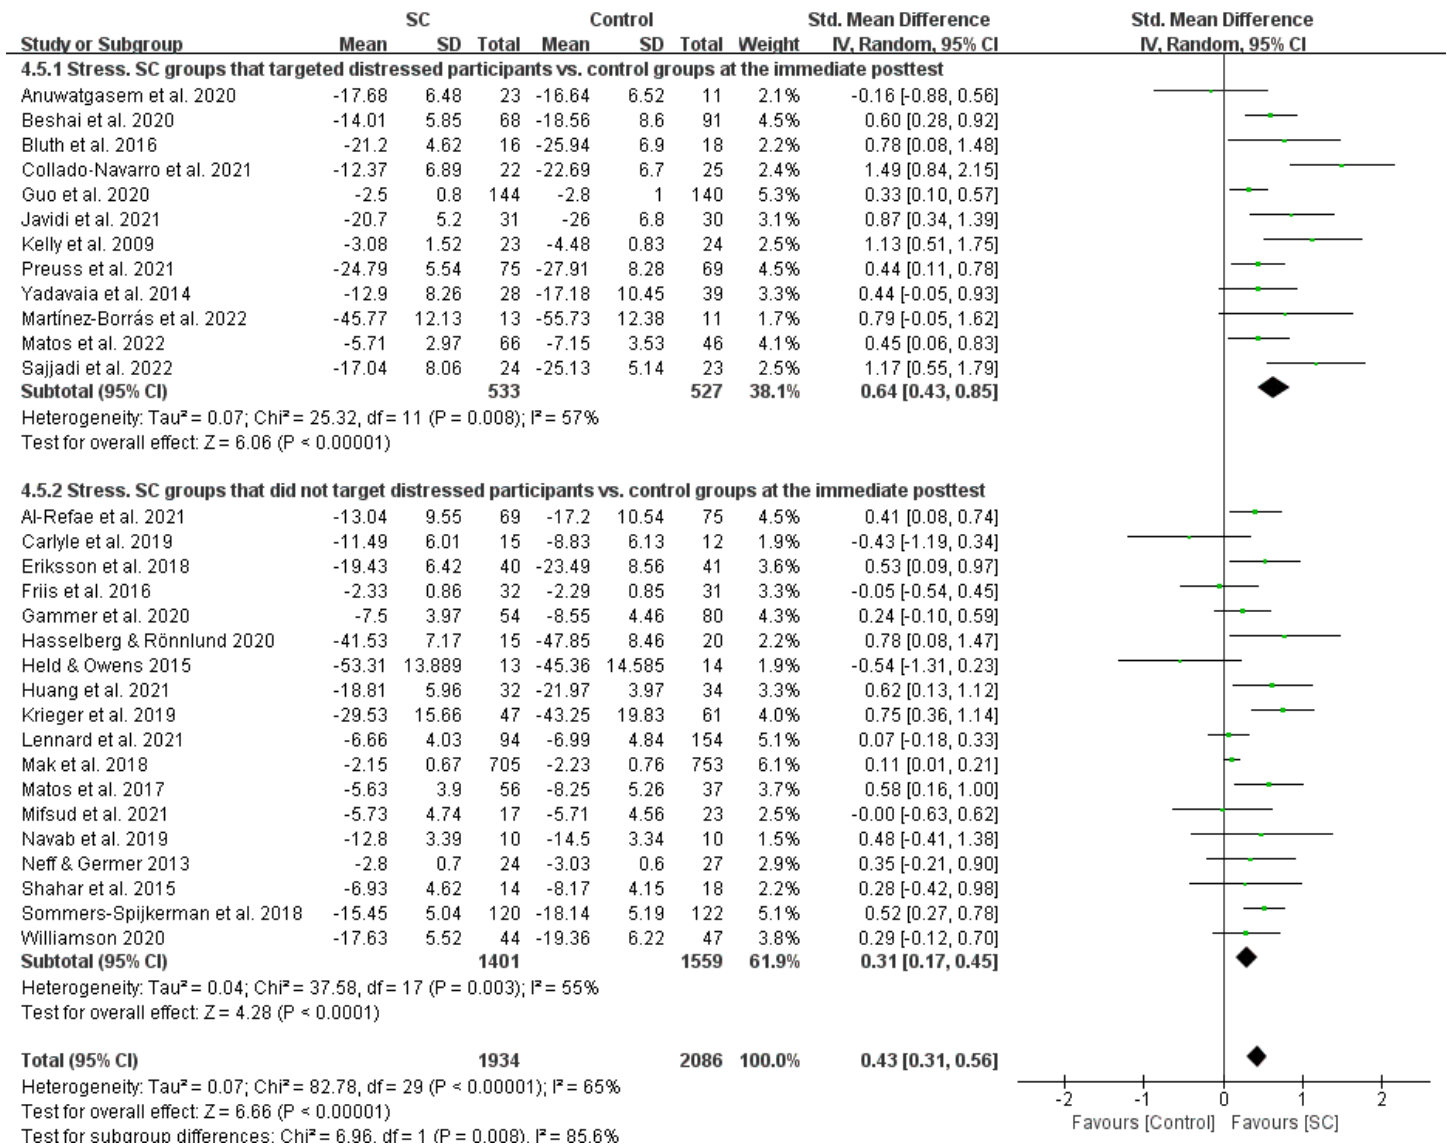

**Fig. S11** Forest plots showing effects of self-compassion interventions on stress according to the involvement of targeted distressed participants at the immediate posttest

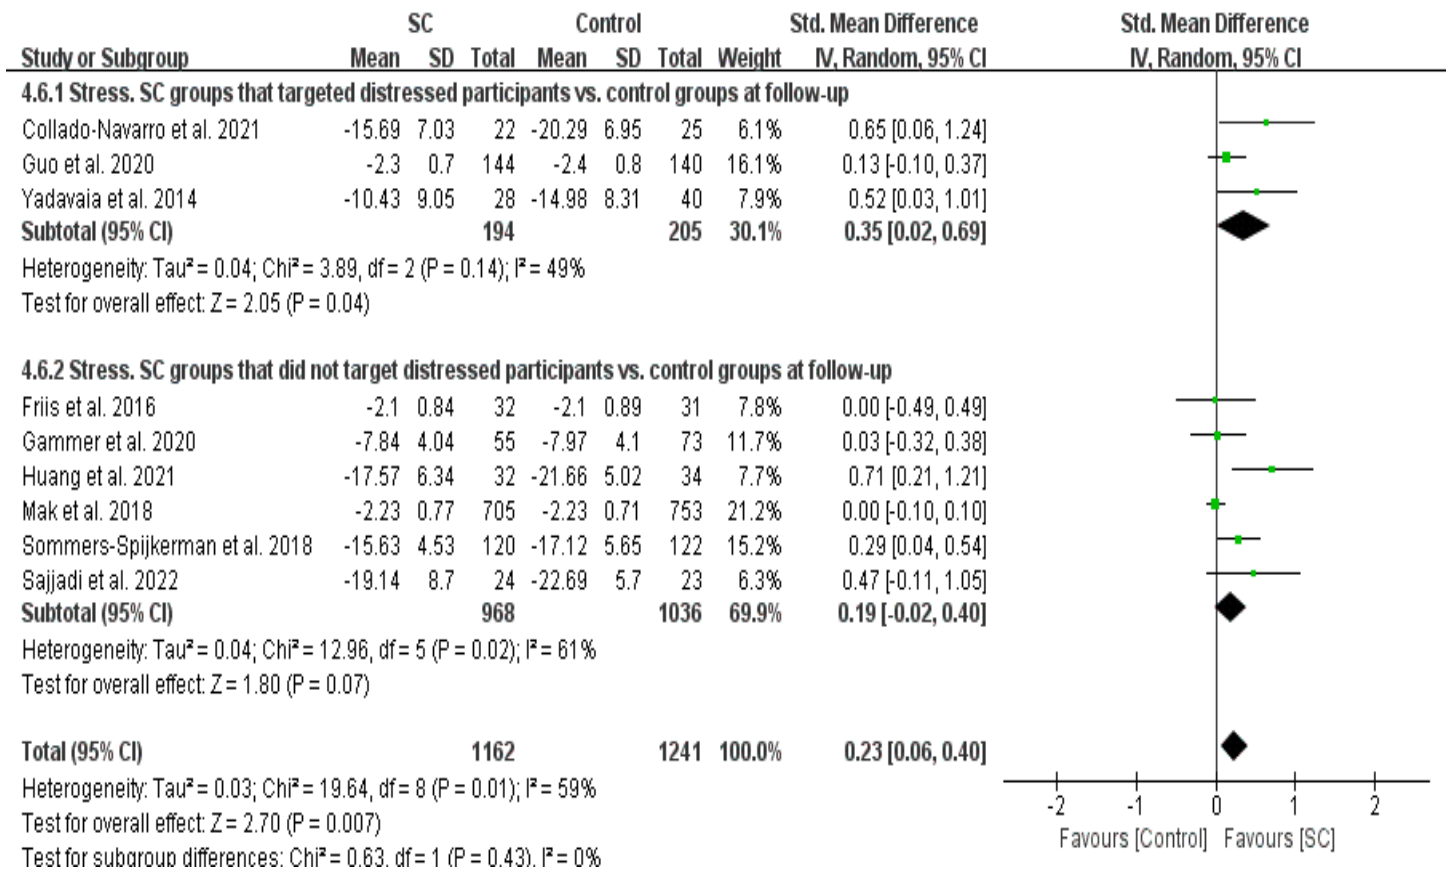

**Fig. S12** Forest plots showing effects of self-compassion interventions on stress according to the involvement of targeted distressed participants at follow-up
